# Supplementary material
Source: HighWire-hosted journal article supplement (https://ez-admanager.com/highwire/filestream/135243/field_highwire_adjunct_files/0/2.3.15_Arterial_stiffness_and_progression.pdf)
Supplement: 2.3.15_Arterial_stiffness_and_progression.pdf [file 2.3.15_Arterial_stiffness_and_progression.pdf]

## Arterial stiffness and progression of structural brain changes: The SMART-MR study

التصلب الشرياني و تطورات التغيرات البنيوية للدماغ: التظاهرات الثانية لدراسة المرض الشرياني-الرنين المغناطيسي

**الغاية :** فحص الترافقات الحالية المقطعية و المرتقبة في ما بين التصلب الشرياني و تغيرات الدماغ البنيوية ضمن التظاهرات الثانية لدراسة المرض الشرياني-الرنين المغناطيسي (SMART\_MR) ، دراسة إستباقية مرتقبة ضمن مرضى الإعتلال شرياني ظاهر.

**طريقة البحث :** تم تطبيق مقاييس اتساع الشرايين السباتية الأصلية و تصوير الدماغ بالرنين المغناطيسي ل 526 مريض ( متوسط العمر  $59 \pm 10$  سنين). بعد المتابعة بمعدل متوسط 4.1 سنة (3.6-5.8 سنة) ، تم إعادة تصوير الرنين المغناطيسي للدماغ في 308 مرضى. تم إستخدام التقاسيم الدماغية للتحديد الكمي لحجم الدماغ الكلي، حجم المادة الرمادية القشرية، حجم البطينات، و حجم آفة المادة البيضاء (WML) (بالنسبة لحجم داخل القحف). تم تقييم الإحتشاءات بصرياً.

**النتائج:** أظهر التحليل المقطعي التراجمي متعدد المتغيرات أن نقصان انحراف معياري واحد لإتساع الشريان السباتي، و الذي يشير الى ازدياد الصلابة الشريانية، كان مترافقاً مع حجم كلي دماغي و حجم قشري رمادي أصغر ( $B = -0.24, 95\% [CI] -0.44 \text{ to } 0.04$ ) ، و ( $B = -0.47\%, 95\% [CI]$ ) ، كما كان مترافقاً مع حجم أكبر لآفة المادة البيضاء (WML) ( $B = 0.09\%$ ) ، ( $B = 0.19\% \text{ to } 0.75\%$ ) ، ( $[CI] -0.01 \text{ to } 0.19\%$ ) مع ازدياد خطر الإصابة باحتشاءات دماغية غير جوبية ( قشرية أو تحت قشرية كبيرة) ( $RR = 1.44, 95\% CI 1.14 \text{ to } 1.81$ ) . و لكن موجوداتنا الإستباقية أظهرت أن الإتساع السباتي لم يكن مترافقاً بشكل كبير مع تفاقم الضمور الدماغية، حجم WML أو احتشاءات دماغية.

**الإستنتاجات:** في هذه المجموعة من المرضى مع إعتلال شرياني متظاهر، كانت صلابة الشرايين السباتية مترافقة بشكل مقطعي زمني مع المزيد من الضمور الدماغية، حجم WML و احتشاءات دماغية غير جوبية، و لكن لم تؤدي الى تغيرات في أحجام الدماغ أو الاحتشاءات بعد أربع سنوات.

**Objective:** To examine the cross-sectional and prospective associations between arterial stiffness and structural brain changes within the Second Manifestations of Arterial Disease-Magnetic Resonance (SMART-MR) study, a prospective cohort study among patients with manifest arterial disease.

**Methods:** Distension measurements of the common carotid arteries and a brain MRI were performed in 526 patients (mean age  $59 \pm 10$  years). After a mean follow-up of 4.1 years (range 3.6–5.8), brain MRI was repeated in 308 patients. Brain segmentation was used to quantify total brain volume, cortical gray matter volume, ventricular volume, and white matter lesion (WML) volume (relative to intracranial volume). Infarcts were rated visually.

**Results:** Cross-sectional multivariable regression analyses showed that 1 SD decrease in carotid distension, indicating increased arterial stiffness, was associated with smaller relative total brain and cortical gray matter volumes ( $B = -0.24\%$ , 95% confidence interval [CI]  $-0.44$  to  $-0.04\%$ , and  $B = -0.47\%$ , 95% CI  $-0.75$  to  $-0.19\%$ ), with larger WML volume ( $B = 0.09\%$ , 95% CI  $-0.01$  to  $0.19\%$ ), and with higher risk of having nonlacunar (cortical or large subcortical) brain infarcts (relative risk = 1.44, 95% CI 1.14 to 1.81). However, our prospective findings showed that carotid distension was not significantly associated with progression of brain atrophy, WML volume, or brain infarcts.

**Conclusion:** In this population of patients with manifest arterial disease, stiffening of the carotid arteries was cross-sectionally associated with more brain atrophy, WML volume, and nonlacunar infarcts, but did not lead to changes in brain volumes or infarcts after 4 years.

---

**Translator:** Mohamad Rahwan MD, Post-Doc Scholar, Department of Neurology, University Hospitals (UHCMC), Cleveland, OH

**Translation reviewer:** Nora Almuslim MD, Department of Neurology, King Fahd Hospital of the University, Khobar, Kingdom of Saudi Arabia
